# Supplementary material for: A Systematic Evaluation of Blood Serum and Plasma Pre-Analytics for Metabolomics Cohort Studies
Source: PubMed Central journal article supplement (PMC5187835; doi:10.3390/ijms17122035), 2016-12-05
Supplement: ijms-17-02035-s001.pdf [file ijms-17-02035-s001.pdf]

# Supplementary Materials: A Systematic Evaluation of Blood Serum and Plasma Pre-Analytcs for Metabolomics Cohort Studies

Elodie Jobard, Olivier Trédan, Déborah Postoly, Fabrice André, Anne Laure Martin, Bénédicte Elena-Herrmann and Sandrine Boyault

**Table S1.** List of metabolic variations discriminating Vp3 vs. Ref samples and corresponding variable importance in the prediction (VIP) values from orthogonal partial least squares (OPLS) analysis. In bold: VIP values > 1 indicate molecules with important weight in the multivariate signature.

| Name of Molecule      | Direction of Change | Serum VIP Value | Plasma VIP Value |
|-----------------------|---------------------|-----------------|------------------|
| 3-Hydroxybutyrate     | -                   | 0.63            | 0.25             |
| Acetate               | -                   | 0.38            | 0.31             |
| Acetoacetate          | -                   | 0.66            | 0.39             |
| Acetone               | +                   | 1.08            | 1.39             |
| Alanine               | +                   | 2.20            | 0.96             |
| Albumin Lysyl         | -                   | 0.17            | 0.29             |
| Choline               | +                   | 2.35            | 2.45             |
| Citrate               | +                   | 0.22            | 0.22             |
| Creatine              | +                   | 0.30            | 0.22             |
| Creatinine            | -                   | 0.33            | 0.3              |
| FAs (mainly LDL)      | +                   | 11.3            | 11.8             |
| FAs (mainly VLDL)     | +                   | 2.72            | 3.33             |
| FAs                   | +                   | 6.32            | 5.30             |
| Formate               | -                   | -               | 0.05             |
| Glucose               | -                   | 3.66            | 4.81             |
| Glutamate             | +                   | 0.41            | -                |
| Glutamine             | -                   | 0.28            | 0.48             |
| Glycerol              | +                   | 0.52            | 0.48             |
| PGLYs & TAGs          | +                   | 1.03            | 0.22             |
| Glycerophosphocholine | +                   | 2.35            | 2.45             |
| Glycine               | +                   | 0.64            | 0.59             |
| Histidine             | +                   | 0.13            | 0.13             |
| Isoleucine            | +                   | 0.29            | 0.28             |
| Lactate               | +                   | 30.7            | 32.2             |
| Leucine               | +                   | 0.71            | 0.23             |
| Lysine                | +                   | 0.26            | 0.25             |
| Methanol              | +                   | 0.28            | 0.21             |
| NAC1                  | -                   | 0.76            | 1.11             |
| NAC2                  | -                   | -               | 0.33             |
| Phenylalanine         | +                   | 0.07            | -                |
| Proline               | -                   | -               | 0.22             |
| Tyrosine              | +                   | 0.09            | 0.12             |
| Valine                | +                   | 0.69            | 0.68             |

FAs: Fatty acids; LDL: low-density lipoprotein; NAC: N-acetylglycoprotein; PGLYs: Phosphoglycerides; TAGs: Triacylglycerides; VLDL: very-low-density lipoprotein. NAC 1 and NAC2 correspond to NMR signals at 2.03 ppm and 2.07 ppm, respectively. Direction of change: +, corresponds to higher concentration in Vp3 serum or plasma metabolic profiles than Ref samples; -, corresponds to lower concentration in Vp3 serum or plasma metabolic profiles than Ref samples.

**Table S2.** Numbers of samples per group (reference and variant protocols).

| Protocol | Nb of Serum Samples <sup>1</sup> | Nb of Plasma Samples <sup>1</sup> |
|----------|----------------------------------|-----------------------------------|
| Ref      | 96                               | 95 (84)                           |
| Vp1      | 11                               | 11 (10)                           |
| Vp2      | 14                               | 14 (13)                           |
| Vp3      | 13                               | 13 (12)                           |
| Vp4      | 12                               | 12 (11)                           |
| Vp5      | 12                               | 11 (9)                            |
| Vp6      | 11                               | 11 (10)                           |
| Vp7      | 12                               | 11 (10)                           |
| Vp8      | 11                               | 11                                |
| Total    | 192                              | 189 (170)                         |

<sup>1</sup> The outliers are included in table. Between parenthesis is indicated the number of samples without outliers.

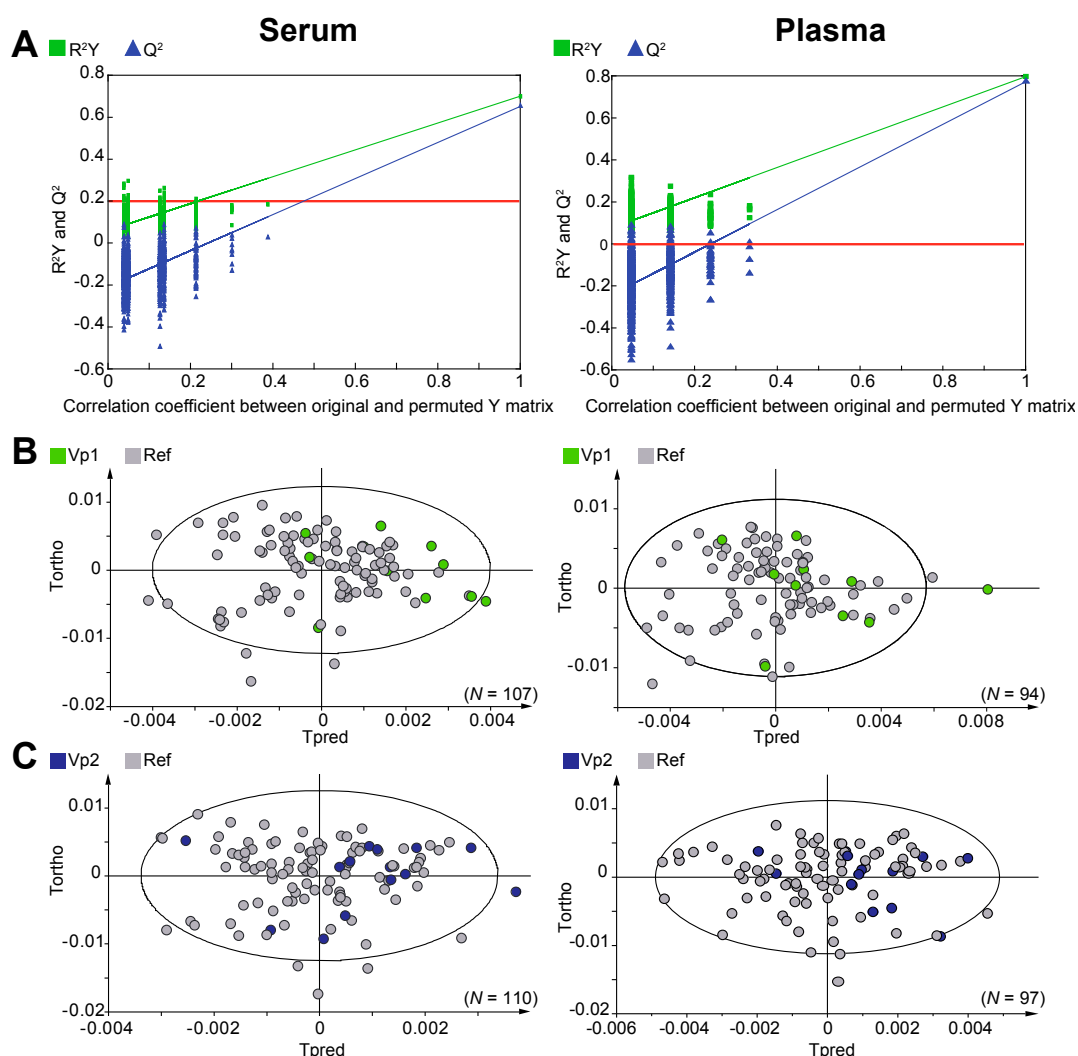

**Figure S1.** OPLS additional data for Vp1, Vp2 and Vp3. (A) OPLS model validations by re-sampling 1000 times the model under the null hypothesis: discriminating Vp3 vs. all standards for the serum cohort and for the plasma cohort; (B) OPLS models for serum cohort, discriminating Vp1 vs. Ref samples ( $N = 107$ ,  $n_{Vp1} = 11$ ,  $n_{Ref} = 96$ , 1+1 components,  $R^2Y = 0.13$ ,  $Q^2 = -0.141$ ) and for plasma cohort ( $N = 94$ ,  $n_{Vp1} = 10$ ,  $n_{Ref} = 84$ , 1+1 components,  $R^2Y = 0.06$ ,  $Q^2 = -0.16$ ); (C) OPLS models for serum cohort, discriminating Vp2 vs. Ref samples ( $N = 110$ ,  $n_{Vp2} = 14$ ,  $n_{Ref} = 96$ , 1+1 components,  $R^2Y = 0.069$ ,  $Q^2 = -0.143$ ) and for plasma cohort ( $N = 97$ ,  $n_{Vp2} = 13$ ,  $n_{Ref} = 84$ , 1+1 components,  $R^2Y = 0.058$ ,  $Q^2 = -0.169$ ).

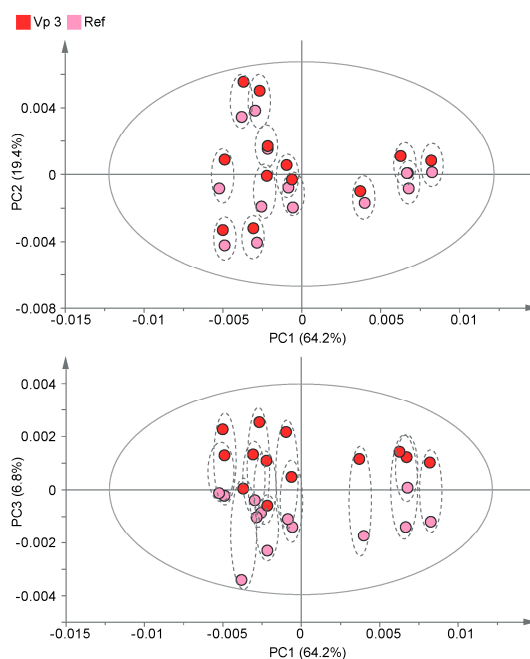

**Figure S2.** Principal component analysis (PCA) score plots showing the influence of the serum clot-contact time at room temperature. **Top:** PC1 vs. PC2; **Bottom:** PC1 vs. PC3. Serum samples from the same patient are surrounded by dotted lines.

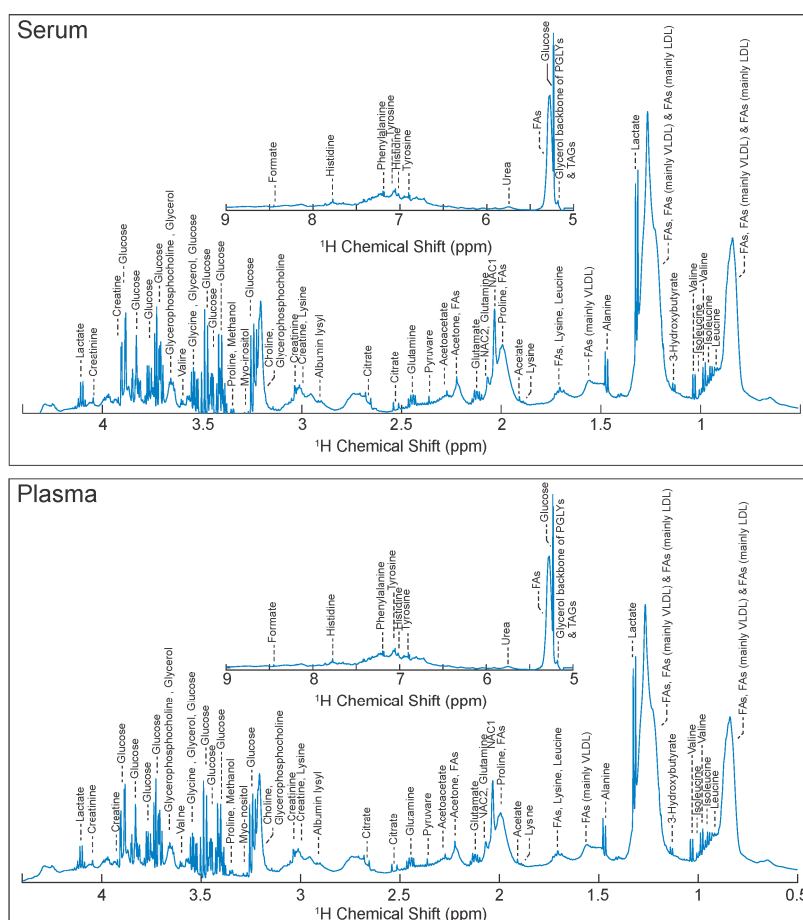

**Figure S3.**  $^1\text{H}$  mean Carr–Purcell–Meiboom–Gill (CPMG) spectra (600 MHz) for serum and plasma samples. FAs: Fatty acids; LDL: low-density lipoprotein; NAC: *N*-acetylglycoprotein (NAC1 and NAC2 correspond to NMR signals at 2.03 ppm and 2.07 ppm, respectively.); PGLYs: Phosphoglycerides; TAGs: Triacylglycerides; VLDL: very-low-density lipoprotein.

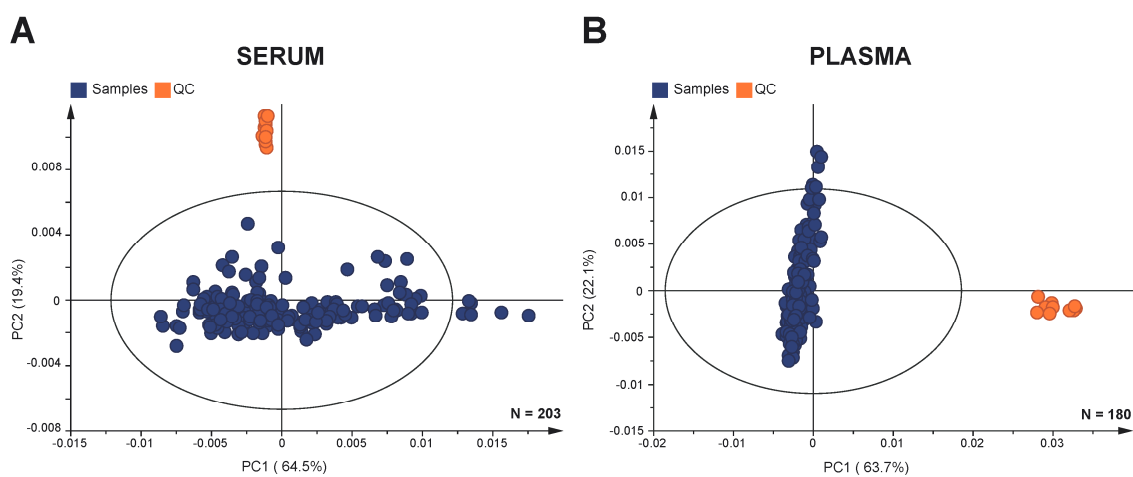

**Figure S4.** PCA score plots of the  $^1\text{H}$  NMR CPMG spectra of blood samples acquired at 600 MHz (PC1 vs. PC2). (A)  $N = 203$  ( $n_{\text{Sample}} = 192$ ,  $n_{\text{QC}} = 11$ ) PC1 = 64.5%, PC2 = 19.4%; (B)  $N = 180$  ( $n_{\text{Sample}} = 170$ ,  $n_{\text{QC}} = 10$ ) PC1 = 63.7%, PC2 = 22.1%.
